# Supplementary material for: Pseudomonas aeruginosa Aggregate Formation in an Alginate Bead Model System Exhibits In Vivo-Like Characteristics
Source: PubMed Central journal article supplement (PMC5394317; doi:10.1128/aem.00113-17), 2017-04-17
Supplement: AEM.00113-17_zam999117808s1.pdf [file AEM.00113-17_zam999117808s1.pdf]

## Supplemental material S1

### *Mathematical models for respiration rate measurements*

We measured a change in O<sub>2</sub> concentration,  $C$  ( $\mu\text{mol l}^{-1} = \text{nmol cm}^{-3}$ ) over time,  $t$  (s), where  $W$  ( $\text{cm}^3$ ) is the volume of the surrounding medium in the incubation vial:

$$\frac{dC}{dt} \times W \text{ (nmol } O_2 \text{ s}^{-1}\text{)} \quad (1)$$

In a filled cuvette with planktonic bacteria the volume is described as

$$V = V_{magnet} + W \quad (2)$$

and in a filled cuvette containing  $n$  beads the volume from which the change in O<sub>2</sub> concentration is measured is

$$V = V_{beads} + V_{magnet} + W \quad (3)$$

A cuvette with total volume  $V$  ( $\text{cm}^3$ ) contains  $n$  individual beads each with a radius  $r_0$  (cm).

The total bead volume is thus described by

$$V_b = n \times \frac{4}{3} \pi r_0^3 (\text{cm}^3) \quad (4)$$

and the total surface area is described by

$$A_b = n \times 4\pi r_0^2 (\text{cm}^2) \quad (5)$$

Thus, the O<sub>2</sub> consumption pr. bead is given by

$$\frac{\left(\frac{dc}{dt}\right) \times W}{n} \text{ (nmol } O_2 \text{ bead}^{-1} \text{ s}^{-1}\text{)} \quad (6)$$

and the cell-specific O<sub>2</sub> respiration rate as

$$\frac{\left(\frac{dC}{dt}\right) \times W}{N} \text{ (nmol } O_2 \text{ cell}^{-1} \text{ s}^{-1}\text{)} \quad (7)$$

where  $N$  is the number of bacterial cells in each alginate bead.

The O<sub>2</sub> consumption pr. surface area pr. bead is given by

$$R(A) = \frac{\left(\frac{dC}{dt} \times W\right) / n}{4\pi r_0^2} \text{ (nmol } O_2 \text{ cm}^{-2} \text{ s}^{-1}\text{)} \quad (8)$$

and the  $O_2$  consumption pr. volume bead is given by:

$$R = \frac{\left(\frac{dC}{dt} \times W\right) / n}{\frac{4}{3}\pi r_0^3} \text{ (nmol } O_2 \text{ cm}^{-3} \text{ s}^{-1}\text{)} \quad (9)$$

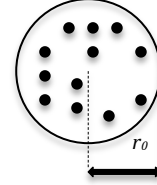

when assuming a homogenous distribution of active bacterial cells throughout the entire bead. If active bacterial cells do not exhibit a homogenous distribution in the bead,  $R$  will be underestimated. If active cells are clustering in the periphery of the beads,  $R(V)$  can instead be calculated as:

$$R = \frac{\left(\frac{dC}{dt} \times W\right)}{n \frac{4}{3}\pi (r_0^3 - r_n^3)} \quad (10)$$

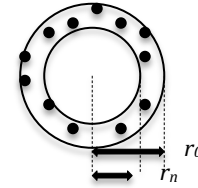

where  $r_0$  and  $r_n$  denote the inner- and outer-most radial distance encompassing the bacterial growth band, i. e., the spherical shell in the bead containing active bacteria.

As a consequence of the respiration of the alginate encapsulated bacteria the  $O_2$  concentration in the alginate bead decreases towards the centre. The  $O_2$  concentration within a spherical cell aggregate at steady state can be described as (11):

$$C_r = -\frac{R}{6D_{agg.}}(r_0^2 - r^2) + C_0 \quad (11)$$

where  $C_r$  is the oxygen concentration at the radial distance  $r$ ,  $D_{agg.}$  is the molecular diffusion coefficient in alginate at  $37^\circ\text{C}$  (here assumed to be similar to  $D$  in water (1) at  $37^\circ\text{C}$ ;  $D = 1.5 \times 10^{-5} \text{ cm}^2 \text{ s}^{-1}$ ),  $R$  is the bead volume-specific respiration rate and  $C_0$  is the  $O_2$  concentration at the surface of the bead. Here we assume that  $C_0$  is the same as for the surrounding medium, due to the absence of an effective diffusive boundary layer,  $\delta_{eff}$ , under the very turbulent environment in which the beads were kept during respiration measurements. In a

stagnant culture, the hypothetical  $\delta_{eff} = r_0$  and in a turbulent environment  $\delta_{eff}$  decreases inversely proportionally with  $Sh$  (the Sherwood number) approaches 0 at high turbulence (1).

Assuming that the centre of the alginate bead is anoxic, the equation can be rearranged to the following allowing for the calculation of the  $O_2$  penetration depth based on volumetric respiration rate and concentration of oxygen at the surface of the beads,  $C_0$ .

$$C_r = -\frac{R}{6D_{agg.}}(r_0^2 - r^2) + C_0 = 0 \quad (12)$$

and

$$C_0 = \frac{Rr_0^2}{6D_{agg.}} \quad (13)$$

and

$$r = \sqrt{\frac{C_0 6D_{agg.}}{R}} \quad (14)$$

In a sphere, were an anoxic core is present because all the  $O_2$  is consumed in the periphery of the sphere, the respiration rate needed to create anoxia at the radial distance  $r$  within a sphere is described by (1):

$$R = 3C_\infty \left( \frac{r_0^2 - r_n^2}{2D_{agg.}} + \frac{\delta_{eff} r_0}{D_w} - \frac{\delta_{eff} r_n^3/r_0^2}{D_w} \right)^{-1} \quad (15)$$

Again, by assuming that the effective boundary layer is non-existent under the experimental conditions, the equation can be re-arranged to the following, by replacing  $\delta_{eff}$  with 0:

$$R = 3C_\infty \left( \frac{r_0^2 - r_n^2}{2D_{agg.}} \right)^{-1} \quad (16)$$

By assuming that the theoretical maximum diffusive boundary layer,  $\delta_{eff} = r_0$  the equation can be re-written as:

$$R = 3C_\infty \left( \frac{r_0^2 - r_n^2}{2D_{agg.}} + \frac{r_0^2}{D_w} - \frac{r_0 r_n^3/r_0^2}{D_w} \right)^{-1} \quad (17)$$

Equations (16) and (17) enable a theoretical estimate of  $R$  under the assumption of no  $\delta_{\text{eff}}$  and a maximum  $\delta_{\text{eff}}$ , respectively, and from the linear relationship between the two a hypothetical DBL can be calculated.

## Supplemental material S2

| Locus ID <sup>a</sup>                        | Gene name    | Linear fold change <sup>b</sup> |                             | Roles <sup>c</sup>                          | Description                                                 |
|----------------------------------------------|--------------|---------------------------------|-----------------------------|---------------------------------------------|-------------------------------------------------------------|
|                                              |              | Beads/Planktonic                | Beads/Beads-NO <sub>3</sub> |                                             |                                                             |
| <b>Upregulated genes in alginate beads</b>   |              |                                 |                             |                                             |                                                             |
| <u>PA1517<sup>e</sup></u>                    |              | 3.02                            | 3.88                        |                                             | Conserved hypothetical protein                              |
| <u>PA1746</u>                                |              | 3.98                            | 3.59                        | O <sub>2</sub> (1, 2), SP (2)               | Hypothetical protein                                        |
| <u>PA2247</u>                                | <i>bkdA1</i> | 3.45                            | 3.04                        | H <sub>2</sub> O <sub>2</sub> (3)           | 2-oxoisovalerate dehydrogenase (alpha subunit)              |
| <u>PA2501</u>                                |              | 4.38                            | 7.43                        | O <sub>2</sub> (1)                          | Hypothetical protein                                        |
| <u>PA2931</u>                                | <i>cifR</i>  | 3.06                            | 3.89                        | VF <sup>d</sup>                             | CifR                                                        |
| <u>PA3006</u>                                | <i>psrA</i>  | 5.82                            | 6.48                        | O <sub>2</sub> (1)                          | Transcriptional regulator PsrA                              |
| <u>PA3126</u>                                | <i>ibpA</i>  | 10.61                           | 15.70                       | O <sub>2</sub> (1), heat-shock <sup>d</sup> | Heat-shock protein ibpA                                     |
| <u>PA3309</u>                                | <i>uspK</i>  | 5.37                            | 4.42                        | O <sub>2</sub> (1, 2)                       | UspK pyruvate fermentation and long-term anaerobic survival |
| <u>PA3531</u>                                | <i>bfrB</i>  | 3.30                            | 3.54                        |                                             | Bacterioferritin                                            |
| <u>PA3601</u>                                |              | 7.35                            | 6.20                        |                                             | Conserved hypothetical protein                              |
| <u>PA4352</u>                                | <i>uspN</i>  | 3.70                            | 3.77                        | O <sub>2</sub> (1, 2), SP (2)               | UspN pyruvate fermentation and long-term anaerobic survival |
| <u>PA4542</u>                                | <i>clpB</i>  | 3.09                            | 3.45                        | Heat-shock <sup>d</sup>                     | ClpB protein                                                |
| <u>PA4577</u>                                |              | 3.72                            | 4.27                        | O <sub>2</sub> (1), SP (2)                  | Hypothetical protein                                        |
| <u>PA4761</u>                                | <i>dnaK</i>  | 3.31                            | 3.66                        | Heat-shock <sup>d</sup>                     | DnaK protein                                                |
| <u>PA5170</u>                                | <i>arcD</i>  | 3.31                            | 3.73                        | O <sub>2</sub> (1), SP (2)                  | Arginine/ornithine antiporter                               |
| <u>PA5232</u>                                |              | 3.12                            | 3.56                        | O <sub>2</sub> (1)                          | Conserved hypothetical protein                              |
| <u>PA5427</u>                                | <i>adhA</i>  | 3.66                            | 4.13                        | O <sub>2</sub> (1, 2), SP (2)               | Alcohol dehydrogenase                                       |
| <b>Downregulated genes in alginate beads</b> |              |                                 |                             |                                             |                                                             |
| <u>PA0122<sup>f</sup></u>                    | <i>rahU</i>  | -6.37                           | -1.31                       | HSL QS (4), SP (2)                          |                                                             |
| <u>PA0139</u>                                | <i>ahpC</i>  | -3.75                           | -2.14                       | H <sub>2</sub> O <sub>2</sub> (3)           | Alkyl hydroperoxide reductase subunit C                     |
| <u>PA0179</u>                                |              | -5.61                           | -1.06                       | SP (2)                                      | Probable two-component response-regulator                   |
| <u>PA0258</u>                                |              | -4.14                           | -2.77                       |                                             | Hypothetical protein                                        |
| <u>PA0264</u>                                |              | -4.46                           | -4.24                       |                                             | Hypothetical protein                                        |
| <u>PA0283</u>                                | <i>sbp</i>   | -3.83                           | -10.85                      |                                             | Sulfate-binding protein precursor                           |
| <u>PA0284</u>                                |              | -17.93                          | -86.03                      |                                             | Hypothetical protein                                        |
| <u>PA0456<sup>g</sup></u>                    |              | -10.01                          | -3.08                       |                                             | Probable cold-shock protein                                 |
| <u>PA0579</u>                                | <i>rpsU</i>  | -3.75                           | -2.97                       |                                             | 30S ribosomal protein S21                                   |
| <u>PA0668</u>                                | <i>tyrZ</i>  | -3.04                           | -1.93                       |                                             | Tyrosyl-tRNA synthetase 2                                   |
| <u>PA0769</u>                                |              | -3.28                           | -2.19                       |                                             | Hypothetical protein                                        |

|               |             |         |         |                                        |                                                                               |
|---------------|-------------|---------|---------|----------------------------------------|-------------------------------------------------------------------------------|
| <u>PA0805</u> |             | -4.27   | -3.48   |                                        | Hypothetical protein                                                          |
| <u>PA0971</u> | <i>tolA</i> | -4.71   | -4.25   |                                        | TolA protein                                                                  |
| <u>PA1178</u> | <i>oprH</i> | -14.13  | -1.06   | SP (2), Mg (5)                         | PhoP/Q and low Mg <sup>2+</sup> inducible outer membrane protein H1 precursor |
| <u>PA1245</u> |             | -7.90   | -7.97   | SP (2)                                 | AprX                                                                          |
| <u>PA1247</u> | <i>aprE</i> | -4.96   | -6.30   |                                        | Alkaline protease secretion protein AprE                                      |
| <u>PA1248</u> | <i>aprF</i> | -3.11   | -4.21   |                                        | Alkaline protease secretion outer membrane protein AprF precursor             |
| <u>PA1372</u> |             | -4.92   | -3.56   |                                        | Hypothetical protein                                                          |
| <u>PA1431</u> | <i>rsaL</i> | -4.38   | -3.30   | SP (2), O <sub>2</sub> (2), HSL QS (4) | Regulatory protein RsaL                                                       |
| <u>PA1533</u> |             | -3.81   | -2.94   |                                        | Conserved hypothetical protein                                                |
| <u>PA1588</u> | <i>sucC</i> | -4.28   | -4.03   |                                        | Succinyl-CoA synthetase beta chain                                            |
| <u>PA1774</u> | <i>crfX</i> | -3.76   | -2.53   |                                        | CrfX protein                                                                  |
| <u>PA1776</u> | <i>sigX</i> | -3.28   | -1.95   |                                        | ECF sigma factor SigX                                                         |
| <u>PA1784</u> |             | -3.06   | -1.46   | SP (2), HSL QS (4)                     | Hypothetical protein                                                          |
| <u>PA1793</u> | <i>ppiB</i> | -3.65   | -1.76   | Heat-shock <sup>d</sup>                | Peptidyl-prolyl cis-trans isomerase B                                         |
| <u>PA1804</u> | <i>hupB</i> | -3.19   | -2.54   |                                        | DNA-binding protein HU                                                        |
| <u>PA1852</u> |             | -3.42   | -3.06   | SP (2)                                 | Hypothetical protein                                                          |
| <u>PA1869</u> |             | -13.92  | -3.69   | HSL QS (4), SP (2)                     | Probably acyl carrier protein                                                 |
| <u>PA1887</u> |             | -3.92   | -1.62   |                                        | Hypothetical protein                                                          |
| <u>PA1888</u> |             | -5.32   | -1.10   | SP (2)                                 | Hypothetical protein                                                          |
| <u>PA1939</u> |             | -3.74   | -2.00   |                                        | Hypothetical protein                                                          |
| <u>PA2037</u> |             | -3.19   | -1.70   |                                        | Hypothetical protein                                                          |
| <u>PA2223</u> |             | -4.51   | -2.64   |                                        | Hypothetical protein                                                          |
| <u>PA2300</u> | <i>chiC</i> | -7.07   | -3.31   | HSL QS (4), SP (2)                     | Chitinase                                                                     |
| <u>PA2384</u> |             | -49.88  | -38.37  | Fe (6)                                 | Hypothetical protein                                                          |
| <u>PA2386</u> | <i>pvdA</i> | -16.14  | -23.73  | Fe (6), VF <sup>d</sup>                | L-ornithine N5-oxygenase                                                      |
| <u>PA2394</u> | <i>pvdN</i> | -3.06   | -6.32   | VF <sup>d</sup>                        | PvdN                                                                          |
| <u>PA2396</u> | <i>pvdF</i> | -10.00  | -9.76   | VF <sup>d</sup>                        | Pyoverdine synthetase F                                                       |
| <u>PA2397</u> | <i>pvdE</i> | -7.31   | -13.49  | VF <sup>d</sup>                        | Pyoverdine biosynthesis protein PvdE                                          |
| <u>PA2398</u> | <i>fpvA</i> | -17.44  | -20.63  | VF <sup>d</sup>                        | Ferripyoverdine receptor                                                      |
| <u>PA2399</u> | <i>pvdD</i> | -3.12   | -2.81   | VF <sup>d</sup>                        | Pyoverdine synthetase D                                                       |
| <u>PA2401</u> | <i>pvdJ</i> | -3.56   | -2.82   | VF <sup>d</sup>                        | PvdJ                                                                          |
| <u>PA2411</u> |             | -3.10   | -4.29   |                                        | Probable thioesterase                                                         |
| <u>PA2412</u> |             | -4.78   | -4.57   |                                        | Conserved hypothetical protein                                                |
| <u>PA2426</u> | <i>pvdS</i> | -130.15 | -115.45 | Fe (6), VF <sup>d</sup>                | Sigma factor PvdS                                                             |
| <u>PA2570</u> | <i>pa1L</i> | -4.38   | -1.83   | HSL QS (4), SP (2)                     | LecA                                                                          |
| <u>PA2582</u> |             | -3.24   | -2.67   |                                        | Hypothetical protein                                                          |
| <u>PA2667</u> | <i>mvaU</i> | -3.46   | -3.94   |                                        | MvaU                                                                          |
| <u>PA2730</u> |             | -4.93   | -5.02   |                                        | Hypothetical protein                                                          |
| <u>PA2733</u> |             | -3.26   | -2.84   |                                        | Conserved hypothetical protein                                                |
| <u>PA2742</u> | <i>rpml</i> | -4.57   | -5.56   |                                        | 50S ribosomal protein L35                                                     |
| <u>PA2797</u> |             | -3.41   | -2.19   |                                        | Hypothetical protein                                                          |
| <u>PA2851</u> | <i>efp</i>  | -4.20   | -2.37   |                                        | Translation elongation factor P                                               |
| <u>PA2966</u> | <i>acpP</i> | -4.24   | -2.11   |                                        | Acyl carrier protein                                                          |

|               |              |        |        |                                                  |                                                          |
|---------------|--------------|--------|--------|--------------------------------------------------|----------------------------------------------------------|
| <u>PA3049</u> | <i>rmf</i>   | -9.54  | -9.61  | Osmotic (7), O <sub>2</sub> (1, 2), SP (2)       | Ribosome modulation factor                               |
| <u>PA3162</u> | <i>rpsA</i>  | -3.09  | -3.47  |                                                  | 30S ribosomal protein S1                                 |
| <u>PA3190</u> |              | -3.26  | -4.56  |                                                  | Probable binding protein of ABC sugar transporter        |
| <u>PA3341</u> |              | -6.30  | -0.64  |                                                  | Probable transcriptional regulator                       |
| <u>PA3385</u> | <i>amrZ</i>  | -17.48 | -1.54  | SP (2)                                           | Alginate and motility regulator Z                        |
| <u>PA3397</u> | <i>fprA</i>  | -4.43  | -5.03  |                                                  | FprA                                                     |
| <u>PA3440</u> |              | -3.91  | -1.84  |                                                  | Conserved hypothetical protein                           |
| <u>PA3450</u> |              | -4.40  | -9.22  |                                                  | Probable antioxidant protein                             |
| <u>PA3477</u> | <i>rhIR</i>  | -6.58  | -5.17  | SP (2), HSL QS (4), VF <sup>d</sup>              | Transcriptional regulator RhIR                           |
| <u>PA3496</u> |              | -4.72  | -1.26  |                                                  | Hypothetical protein                                     |
| <u>PA3520</u> |              | -3.81  | -2.74  | SP (2), HSL QS (4)                               | Hypothetical protein                                     |
| <u>PA3530</u> | <i>bfd</i>   | -24.20 | -13.65 | Fe (6)                                           | Bacterioferritin-associated ferredoxin Bfd               |
| <u>PA3533</u> | <i>grxD</i>  | -3.22  | -1.86  |                                                  | GrxD                                                     |
| <u>PA3621</u> | <i>fdxA</i>  | -4.19  | -1.23  |                                                  | Ferredoxin I                                             |
| <u>PA3622</u> | <i>rpoS</i>  | -8.50  | -6.24  | SP (2)                                           | Sigma factor RpoS                                        |
| <u>PA3645</u> | <i>fabZ</i>  | -3.17  | -3.77  |                                                  | (3R)-hydroxymyristoyl-[acyl carrier protein] dehydratase |
| <u>PA3662</u> |              | -5.12  | -0.37  | O <sub>2</sub> (1), SP (2)                       | Hypothetical protein                                     |
| <u>PA3724</u> | <i>lasB</i>  | -5.64  | -4.57  | VF <sup>d</sup> , SP (2) HSL QS (4)              | Elastase LasB                                            |
| <u>PA3756</u> |              | -4.37  | -1.78  |                                                  | Hypothetical protein                                     |
| <u>PA3812</u> | <i>iscA</i>  | -6.07  | -9.35  | O <sub>2</sub> (1)                               | Probable iron-binding protein IscA                       |
| <u>PA3813</u> | <i>iscU</i>  | -7.71  | -12.18 |                                                  | Probable iron-binding protein IscU                       |
| <u>PA3814</u> | <i>iscS</i>  | -4.47  | -6.75  |                                                  | L-cysteine desulfurase (pyridoxal phosphate-dependent)   |
| <u>PA3815</u> | <i>iscR</i>  | -5.48  | -5.02  |                                                  | IscR                                                     |
| <u>PA3931</u> |              | -5.89  | -13.42 |                                                  | Conserved hypothetical protein                           |
| <u>PA3966</u> |              | -3.34  | -2.79  |                                                  | Hypothetical protein                                     |
| <u>PA4139</u> |              | -5.20  | -3.75  |                                                  | Hypothetical protein                                     |
| <u>PA4141</u> |              | -7.91  | -8.70  | SP (2), HSL QS (4)                               | Hypothetical protein                                     |
| <u>PA4156</u> | <i>fvbA</i>  | -3.00  | -1.24  |                                                  | FvbA                                                     |
| <u>PA4211</u> | <i>phzB1</i> | -19.06 | -12.44 | VF <sup>d</sup> , SP (2), phenazine <sup>d</sup> | Probable phenazine biosynthesis protein                  |
| <u>PA4221</u> | <i>fptA</i>  | -15.17 | -8.18  | Fe (6), VF <sup>d</sup>                          | Fe(III)-pyochelin outer membrane receptor precursor      |
| <u>PA4223</u> |              | -4.06  | -2.25  | Fe (6), VF <sup>d</sup>                          | Probable ATP-binding component of ABC transporter        |
| <u>PA4224</u> | <i>phcG</i>  | -4.67  | -1.86  | Fe (6), VF <sup>d</sup>                          | Pyochelin biosynthetic protein PchG                      |
| <u>PA4226</u> | <i>pchE</i>  | -3.69  | -1.41  | Fe (6), VF <sup>d</sup>                          | Dihydroaeruginic acid synthetase                         |
| <u>PA4228</u> | <i>pchD</i>  | -7.52  | -3.11  | Fe (6), VF <sup>d</sup>                          | Pyochelin biosynthesis protein PchD                      |
| <u>PA4229</u> | <i>pchC</i>  | -3.14  | -2.30  | Fe (6), VF <sup>d</sup>                          | Pyochelin biosynthetic protein PchC                      |
| <u>PA4230</u> | <i>pchB</i>  | -4.22  | -1.56  | Fe (6), VF <sup>d</sup>                          | Salicylate biosynthesis protein PchB                     |
| <u>PA4231</u> | <i>pchA</i>  | -4.20  | -1.73  | Fe (6), VF <sup>d</sup>                          | Salicylate biosynthesis isochorismate synthase           |
| <u>PA4232</u> | <i>ssb</i>   | -3.35  | -1.65  |                                                  | Single-stranded DNA-binding protein                      |
| <u>PA4238</u> | <i>rpoA</i>  | -8.94  | -10.89 |                                                  | DNA-directed RNA polymerase alpha chain                  |
| <u>PA4241</u> | <i>rpsM</i>  | -4.97  | -4.12  |                                                  | 30S ribosomal protein S13                                |

|               |              |        |        |                                                    |                                                                     |
|---------------|--------------|--------|--------|----------------------------------------------------|---------------------------------------------------------------------|
| <u>PA4242</u> | <i>rpmJ</i>  | -20.88 | -21.40 |                                                    | 50S ribosomal protein L36                                           |
| <u>PA4245</u> | <i>rpmD</i>  | -4.00  | -4.39  |                                                    | 50S ribosomal protein L30                                           |
| <u>PA4246</u> | <i>rpsE</i>  | -5.65  | -5.56  |                                                    | 30S ribosomal protein S5                                            |
| <u>PA4248</u> | <i>rplF</i>  | -3.55  | -2.48  |                                                    | 50S ribosomal protein L6                                            |
| <u>PA4249</u> | <i>rpsH</i>  | -5.78  | -3.81  |                                                    | 30S ribosomal protein S8                                            |
| <u>PA4250</u> | <i>rpsN</i>  | -4.57  | -3.98  |                                                    | 30S ribosomal protein S14                                           |
| <u>PA4251</u> | <i>rplE</i>  | -5.43  | -5.34  |                                                    | 50S ribosomal protein L5                                            |
| <u>PA4253</u> | <i>rplN</i>  | -5.19  | -5.12  |                                                    | 50S ribosomal protein L14                                           |
| <u>PA4254</u> | <i>rpsQ</i>  | -8.35  | -8.65  |                                                    | 30S ribosomal protein S17                                           |
| <u>PA4255</u> | <i>rpmC</i>  | -9.23  | -9.51  |                                                    | 50S ribosomal protein L29                                           |
| <u>PA4256</u> | <i>rplP</i>  | -4.60  | -4.50  |                                                    | 50S ribosomal protein L16                                           |
| <u>PA4257</u> | <i>rpsC</i>  | -9.48  | -9.52  |                                                    | 30S ribosomal protein S3                                            |
| <u>PA4258</u> | <i>rplV</i>  | -6.20  | -5.91  |                                                    | 50S ribosomal protein L22                                           |
| <u>PA4259</u> | <i>rpsS</i>  | -5.30  | -5.35  |                                                    | 30S ribosomal protein S19                                           |
| <u>PA4260</u> | <i>rplB</i>  | -4.54  | -4.58  | Nitrosative stress (8)                             | 50S ribosomal protein L2                                            |
| <u>PA4261</u> | <i>rplW</i>  | -8.78  | -6.48  |                                                    | 50S ribosomal protein L23                                           |
| <u>PA4262</u> | <i>rplD</i>  | -4.38  | -4.15  |                                                    | 50S ribosomal protein L4                                            |
| <u>PA4264</u> | <i>rpsJ</i>  | -4.53  | -3.02  |                                                    | 30S ribosomal protein S10                                           |
| <u>PA4266</u> | <i>fusA1</i> | -5.69  | -4.82  |                                                    | Elongation factor G                                                 |
| <u>PA4268</u> | <i>rpsL</i>  | -3.09  | -2.64  |                                                    | 30S ribosomal protein S12                                           |
| <u>PA4271</u> | <i>rplL</i>  | -4.23  | -3.48  |                                                    | 50S ribosomal protein L7/L12                                        |
| <u>PA4272</u> | <i>rplJ</i>  | -13.64 | -11.90 |                                                    | 50S ribosomal protein L10                                           |
| <u>PA4273</u> | <i>rplA</i>  | -5.94  | -4.60  |                                                    | 50S ribosomal protein L1                                            |
| <u>PA4274</u> | <i>rplK</i>  | -12.49 | -12.34 |                                                    | 50S ribosomal protein L11                                           |
| <u>PA4276</u> | <i>secE</i>  | -3.62  | -3.11  |                                                    | Secretion protein SecE                                              |
| <u>PA4296</u> | <i>pprB</i>  | -3.22  | -1.03  | SP (2)                                             | Two-component response regulator PprB                               |
| <u>PA4370</u> | <i>icmP</i>  | -4.82  | -4.76  | Fe (6)                                             | Insulin-cleaving metalloproteinase outer membrane protein precursor |
| <u>PA4433</u> | <i>rplM</i>  | -3.47  | -1.31  |                                                    | 50S ribosomal protein L13                                           |
| <u>PA4443</u> | <i>cysD</i>  | -4.82  | -6.09  |                                                    | ATP sulfurylase small subunit                                       |
| <u>PA4451</u> |              | -4.69  | -2.21  |                                                    | Conserved hypothetical protein                                      |
| <u>PA4468</u> | <i>sodM</i>  | -8.88  | -7.74  | Fe (6), H <sub>2</sub> O <sub>2</sub> (3)          | Superoxide dismutase                                                |
| <u>PA4469</u> |              | -30.88 | -36.81 | Fe (6), SP (2)                                     | Hypothetical protein                                                |
| <u>PA4470</u> | <i>fumC1</i> | -15.70 | -13.94 | H <sub>2</sub> O <sub>2</sub> (3), VF <sup>d</sup> | Fumarate hydratase                                                  |
| <u>PA4471</u> |              | -83.87 | -78.93 | Fe (6)                                             | Hypothetical protein                                                |
| <u>PA4515</u> |              | -5.27  | -5.57  | Fe (6)                                             | Conserved hypothetical protein                                      |
| <u>PA4537</u> |              | -3.04  | -2.49  |                                                    | Hypothetical protein                                                |
| <u>PA4556</u> | <i>pilE</i>  | -3.65  | -2.67  | VF <sup>d</sup>                                    | Type 4 fimbrial biogenesis protein Pile                             |
| <u>PA4563</u> | <i>rpsT</i>  | -7.57  | -2.74  |                                                    | 30S ribosomal protein S20                                           |
| <u>PA4568</u> | <i>rplU</i>  | -3.55  | -2.66  |                                                    | 50S ribosomal protein L21                                           |
| <u>PA4570</u> |              | -65.86 | -46.45 |                                                    | Hypothetical protein                                                |
| <u>PA4638</u> |              | -29.13 | -24.38 |                                                    | Hypothetical protein                                                |
| <u>PA4723</u> | <i>dksA</i>  | -3.11  | -1.49  |                                                    | Suppressor protein DksA                                             |
| <u>PA4738</u> |              | -6.10  | -3.56  | O <sub>2</sub> (2), SP (2)                         | Conserved hypothetical protein                                      |



|               |              |       |       |                            |                                         |
|---------------|--------------|-------|-------|----------------------------|-----------------------------------------|
| <u>PA4739</u> |              | -6.33 | -3.25 | SP (2), O <sub>2</sub> (2) | Conserved hypothetical protein          |
| <i>PA4843</i> | <i>gcbA</i>  | -4.62 | -1.03 | SP (2), cdiGMP (9)         | GcbA                                    |
| <u>PA4853</u> | <i>fis</i>   | -6.63 | -4.00 |                            | DNA-binding protein Fis                 |
| <i>PA4944</i> | <i>hfq</i>   | -3.25 | -1.97 |                            | Hfq                                     |
| <i>PA5041</i> | <i>pilP</i>  | -3.04 | -2.12 | VF <sup>d</sup>            | Type 4 fimbrial biogenesis protein PilP |
| <u>PA5163</u> | <i>rmlA</i>  | -4.87 | -5.48 |                            | Glucose-1-phosphate thymidyltransferase |
| <i>PA5315</i> | <i>rpmG</i>  | -3.99 | -2.46 |                            | 50S ribosomal protein L33               |
| <i>PA5316</i> | <i>rpmB</i>  | -3.11 | -2.26 |                            | 50S ribosomal protein L28               |
| <i>PA5348</i> |              | -3.10 | -1.96 |                            | Probable DNA-binding protein            |
| <i>PA5351</i> | <i>rubA1</i> | -4.35 | -1.56 |                            | Rubredoxin 1                            |
| <u>PA5460</u> | <i>phoB</i>  | -5.74 | -3.89 |                            | Two-component response regulator PhoB   |
| <u>PA5531</u> | <i>tonB</i>  | -4.59 | -4.15 | Fe (6)                     | TonB1                                   |
| <i>PA5557</i> | <i>atpH</i>  | -3.63 | -2.56 |                            | ATP synthase delta chain                |
| <i>PA5560</i> | <i>atpB</i>  | -3.16 | -2.46 |                            | ATP synthase A chain                    |
| <i>PA5563</i> | <i>soj</i>   | -3.03 | -2.95 | Nitrosative stress (8)     | Chromosome partitioning protein Soj     |
| <i>PA5570</i> | <i>rpmH</i>  | -3.18 | -2.77 |                            | 50S ribosomal protein L34               |

**Table S2.** List of genes with an >3-fold change in gene expression in alginate-encapsulated *P. aeruginosa* when compared to 24 hours planktonic culture of *P. aeruginosa* and the corresponding 24 hours alginate-encapsulated *P. aeruginosa* supplemented with 100 mM KNO<sub>3</sub> as compared to 24 hours planktonic culture.

<sup>a</sup> ID: identification

<sup>b</sup> Detection of >3-fold increase in gene expression of alginate-encapsulated *P. aeruginosa* (Beads) compared to planktonic cells (Planktonic) and the corresponding gene expression when alginate-encapsulated *P. aeruginosa* is compared to alginate-encapsulated *P. aeruginosa* supplemented with nitrate (Beads-NO<sub>3</sub>). Bead data is based on 4 biological replicas. Planktonic and Beads-NO<sub>3</sub> data is based on 3 biological replicas.

<sup>c</sup> O<sub>2</sub>, oxygen limitation; SP, stationary phase; H<sub>2</sub>O<sub>2</sub>, peroxide stress; VF, virulence factor; Fe, iron limitation; Mg, magnesium limitation; HSL QS, homoserine lactone based quorum sensing; cdiGMP, cyclic diguanylate GMP.

<sup>d</sup> As annotated at pseudomonas.com (10).

<sup>e</sup> The 141 genes shared between Beads/Planktonic and Beads/Beads-NO<sub>3</sub><sup>-</sup> are underlined. All 17 genes from the Beads/Planktonic comparison are shared with Beads/Beads-NO<sub>3</sub><sup>-</sup>, whereas 87 of the 153 downregulated genes have a similar >3-fold differential expression.

<sup>f</sup> The 13 genes shared between Beads/Planktonic and Beads-NO<sub>3</sub><sup>-</sup>/Planktonic are all downregulated, and are marked in *italic* in Table S2.

<sup>g</sup> The two genes which share a similar >3-fold change between all three comparisons (beads/planktonic, beads/beads-NO<sub>3</sub><sup>-</sup> and beads-NO<sub>3</sub><sup>-</sup>/planktonic) are highlighted in gray. The same two genes are shared between Beads/Beads-NO<sub>3</sub><sup>-</sup> and Beads-NO<sub>3</sub><sup>-</sup>/Planktonic, according to Venn-diagramm (Figure 8A).

All genes encoding ribosomal proteins have been boxed.

1. Trunk K, *et al.* (2010) Anaerobic adaptation in *Pseudomonas aeruginosa*: definition of the Anr and Dnr regulons. *Environmental microbiology* 12(6):1719-1733.
2. Alvarez-Ortega C & Harwood CS (2007) Responses of *Pseudomonas aeruginosa* to low oxygen indicate that growth in the cystic fibrosis lung is by aerobic respiration. *Molecular microbiology* 65(1):153-165.
3. Chang W, Small DA, Toghrol F, & Bentley WE (2005) Microarray analysis of *Pseudomonas aeruginosa* reveals induction of pyocin genes in response to hydrogen peroxide. *BMC genomics* 6:115.
4. Hentzer M, *et al.* (2003) Attenuation of *Pseudomonas aeruginosa* virulence by quorum sensing inhibitors. *The EMBO journal* 22(15):3803-3815.
5. McPhee JB, *et al.* (2006) Contribution of the PhoP-PhoQ and PmrA-PmrB two-component regulatory systems to Mg<sup>2+</sup>-induced gene regulation in *Pseudomonas aeruginosa*. *Journal of bacteriology* 188(11):3995-4006.

6. Ochsner UA, Wilderman PJ, Vasil AI, & Vasil ML (2002) GeneChip expression analysis of the iron starvation response in *Pseudomonas aeruginosa*: identification of novel pyoverdine biosynthesis genes. *Molecular microbiology* 45(5):1277-1287.
7. Aspedon A, Palmer K, & Whiteley M (2006) Microarray analysis of the osmotic stress response in *Pseudomonas aeruginosa*. *Journal of bacteriology* 188(7):2721-2725.
8. Firoved AM, Wood SR, Ornatowski W, Deretic V, & Timmins GS (2004) Microarray analysis and functional characterization of the nitrosative stress response in nonmucoid and mucoid *Pseudomonas aeruginosa*. *Journal of bacteriology* 186(12):4046-4050.
9. Kulasakara H, *et al.* (2006) Analysis of *Pseudomonas aeruginosa* diguanylate cyclases and phosphodiesterases reveals a role for bis-(3'-5')-cyclic-GMP in virulence. *Proceedings of the National Academy of Sciences of the United States of America* 103(8):2839-2844.
10. Winsor GL, *et al.* (2016) Enhanced annotations and features for comparing thousands of *Pseudomonas* genomes in the *Pseudomonas* genome database. *Nucleic acids research* 44(D1):D646-653.
